# Supplementary material for: Assessment of the Diagnostic Performance of Endoscopic Ultrasonography After Conventional Endoscopy for the Evaluation of Esophageal Squamous Cell Carcinoma Invasion Depth
Source: PubMed Central journal article supplement (PMC8444025; doi:10.1001/jamanetworkopen.2021.25317), 2021-09-15
Supplement: jamanetwopen-e2125317-s001.pdf [file jamanetwopen-e2125317-s001.pdf]

## Supplementary Online Content

Ishihara R, Mizusawa J, Kushima R, et al. Assessment of the diagnostic performance of endoscopic ultrasonography after conventional endoscopy for the evaluation of esophageal squamous cell carcinoma invasion depth. *JAMA Netw Open*. 2021;4(9):e2125317. doi:10.1001/jamanetworkopen.2021.25317

**eTable 1.** Reasons for Exclusion

**eTable 2.** Parameters for Differentiating  $\geq$ SM2 From  $\leq$ SM1 Cancers

**eFigure.** Clinical Diagnosis, Treatments, and Pathological Diagnosis

This supplementary material has been provided by the authors to give readers additional information about their work.

**eTable 1. Reasons for Exclusion**

| Excluded before the second registration                                              | No (%)    |
|--------------------------------------------------------------------------------------|-----------|
| Cancer invasion depth of cEP, cLPM, or cT2 on endoscopic diagnosis by non-ME+ME      | 33 (45.8) |
| Could not receive endoscopic examination within 14 days after the first registration | 11 (15.3) |
| Major axis length > 50 mm                                                            | 10 (13.9) |
| Diagnoses of metastasis                                                              | 6 (8.3)   |
| Cancers located in the abdominal esophagus                                           | 4 (5.6)   |
| Other reason                                                                         | 8 (11.1)  |
|                                                                                      |           |
| Excluded from the final analyses                                                     | No (%)    |
| Did not undergo cancer resection                                                     | 19 (61.3) |
| Diagnoses of metastasis                                                              | 2 (6.5)   |
| Histology other than squamous cell carcinoma                                         | 1 (3.2)   |
| Improper second registration (e.g. second registration after EUS)                    | 9 (29.0)  |

EP: epithelium, LPM: lamina propria, non-ME: non-magnifying endoscopy, ME: non-magnifying endoscopy, EUS: endoscopic ultrasonography.

**eTable 2.** Parameters for Differentiating  $\geq$ SM2 From  $\leq$ SM1 Cancers

|                   | Sensitivity<br>No.<br>(% [95%CI]) | Specificity<br>No.<br>(% [95%CI]) | PPV<br>No.<br>(% [95%CI])     | NPV<br>No.<br>(% [95%CI])      | Accuracy<br>No.<br>(% [95%CI])   |
|-------------------|-----------------------------------|-----------------------------------|-------------------------------|--------------------------------|----------------------------------|
| Non-ME            | 60/115<br>(52.2% [42.7%-61.6%])   | 139/154<br>(90.3% [84.4-94.5])    | 60/75<br>(80.0% [69.2-88.4])  | 139/194<br>(71.6% [64.8-77.9]) | 199/269<br>(74.0% [68.3-79.1])   |
| Non-ME+ME         | 58/115<br>(50.4% [41.0%-59.9%])   | 138/154<br>(89.6% [83.7%-93.9%])  | 58/74<br>(78.4% [67.3-87.1])  | 138/195<br>(70.8% [63.8-77.0]) | 196/269<br>(72.9% [67.1%-78.1%]) |
| Non-ME+ME<br>+EUS | 74/115<br>(64.3% [54.9%-73.1%])   | 125/154<br>(81.2% [74.1%-87.0%])  | 74/103<br>(71.8% [62.1-80.3]) | 125/166<br>(75.3% [68.0-81.7]) | 199/269<br>(74.0% [68.3%-79.1%]) |

CI: confidence interval, SM: submucosa, non-ME: non-magnifying endoscopy, ME: non-magnifying endoscopy, EUS: endoscopic ultrasonography, PPV: positive predictive value, NPV: negative predictive value

**eFigure.** Clinical Diagnosis, Treatments, and Pathological Diagnosis

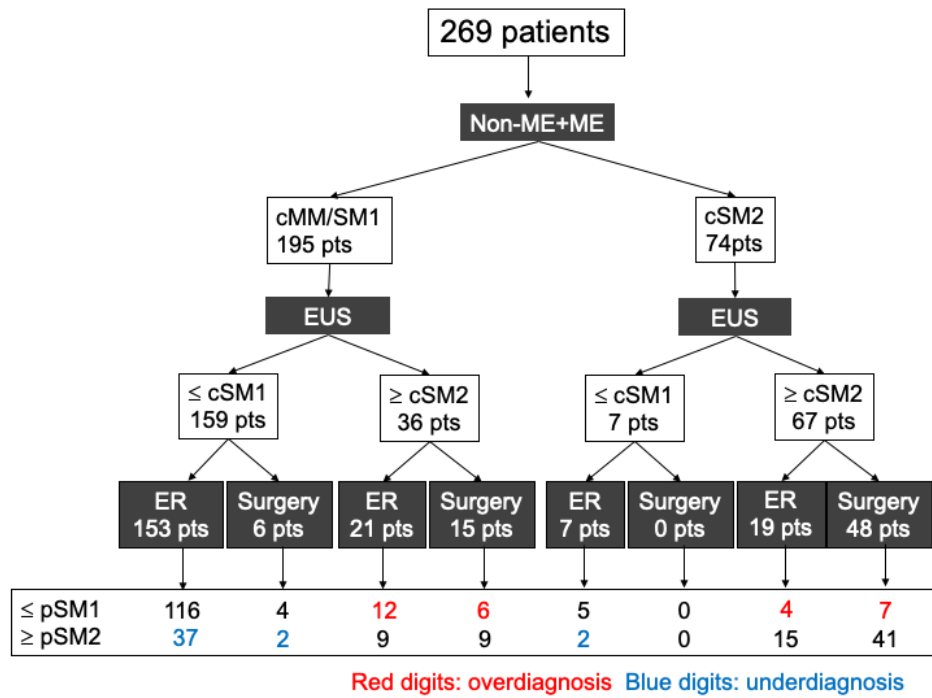

Non-ME: non-magnifying endoscopy, ME: non-magnifying endoscopy, EUS: endoscopic ultrasonography, SM: submucosa, ER: endoscopic resection, pts: patients.
